# Supplementary material for: Using normalisation process theory to understand workflow implications of decision support implementation across diverse primary care settings
Source: PubMed Central journal article supplement — BMJ Health Care Inform. 2019 Oct 19;26(1):e100088. doi: 10.1136/bmjhci-2019-100088 (PMC7062348; doi:10.1136/bmjhci-2019-100088), 2019-10-19
Supplement: bmjhci-2019-100088supp001.pdf [file bmjhci-2019-100088supp001.pdf]

Appendix 1: Survey Questionnaire  
Confidential

Page 1 of 2

## 6 Month Follow-Up

Please complete the short survey below by using the slider to indicate your response for each question.

- 1) How well do you think that clinicians and staff distinguish the iCPR (integrated clinical prediction rules) from current ways of working?
 

Not at all Completely

(Place a mark on the scale above)
- 2) How much do clinicians and staff collectively agree about the purpose of the iCPR?
 

Not at all Completely

(Place a mark on the scale above)
- 3) How well do clinicians and staff individually understand what the iCPR requires of them?
 

Not at all Completely

(Place a mark on the scale above)
- 4) How well are clinicians and staff able to construct potential value of the iCPR for their work?
 

Not at all Completely

(Place a mark on the scale above)
- 5) To what extent are key individuals driving the iCPR implementation forward?
 

Not at all Completely

(Place a mark on the scale above)
- 6) To what extent do clinicians and staff agree that the iCPR should be part of their work?
 

Not at all Completely

(Place a mark on the scale above)
- 7) To what extent do clinicians and staff buy in to using the iCPR?
 

Not at all Completely

(Place a mark on the scale above)
- 8) To what extent do clinicians and staff continue to support use of the iCPR?
 

Not at all Completely

(Place a mark on the scale above)
- 9) How well are clinicians and staff able to perform the tasks required by the iCPR?
 

Not at all Completely

(Place a mark on the scale above)
- 10) To what extent do clinicians and staff maintain their trust in each other's work and expertise through the implementation of the iCPR?
 

Not at all Completely

(Place a mark on the scale above)
- 11) How appropriately is the work of the iCPR allocated to clinicians and staff?
 

Not at all Completely

(Place a mark on the scale above)
- 12) To what extent is the implementation of the iCPR adequately supported by your organization?
 

Not at all Completely

(Place a mark on the scale above)
